# Supplementary material for: Titanate nanoribbon-based nanobiohybrid for potential applications in regenerative medicine
Source: Royal Society of Chemistry journal article supplement (doi:10.1039/d2ra04753e), 2022-01-01
Supplement: d2ra04753e1.pdf [file d2ra04753e1.pdf]

## 1. Supplementary information

### 1.1 Synthesis of silanized and heterobifunctional PEGs

Methoxy polyethylene glycol 5000 g.mol<sup>-1</sup> (mPEG<sub>5000</sub>) was silanized with 3-isocyanatopropyltriethoxysilane (IPTES) with a molar excess of 1.8 IPTES for 1 PEG in THF at 20°C, 700 rpm for 5 days under inert atmosphere<sup>55,56</sup>. After reaction THF was evaporated and the mPEG<sub>5000</sub>-Si was precipitated in heptane, filtered and freeze dried before use.

Heterobifunctional PEG was prepared to be grafted on nanoribbons *via* silane groups and to provide, at the other end, reactive groups for protein interactions. To this end, the carboxymethyl ester of N-hydroxysuccinimide (NHS) chemical group was chosen to increase reactivity between NHS and proteins.

Commercial NHS-PEG<sub>5000</sub>-OH (JenKem Technology) was silanized with (IPTES) following and updating a protocol found in literature<sup>57</sup>. Briefly, IPTES and NHS-PEG<sub>5000</sub>-OH were mixed at a 5:1 molar ratio in CH<sub>2</sub>Cl<sub>2</sub> at 40°C, 700 rpm for 5 days under inert atmosphere (Figure SI\_1). The NHS-PEG<sub>5000</sub>-Si obtained with a yield of 80% was also freeze-dried before use and characterization.

**Figure SI\_1. Reaction to obtain bifunctional PEG<sub>5000</sub> with NHS ester and triethoxysilane groups (NHS-PEG<sub>5000</sub>-OH: NHS ester functionalized PEG<sub>5000</sub>).**

## 1.2 Study of the reproducibility of the synthesis of TiONRs by TEM and X-Ray Diffraction of TiONRs

The structure of the nanoparticles was obtained using different characterization techniques. To measure chemical structures of TiONRs, X-ray diffraction (XRD) was realized on an INEL CPS 120 diffractometer with Cu K $\alpha$  radiation ( $\lambda = 1.54056 \text{ \AA}$ ). Determination of the peak positions as well as curve fittings were performed on Fityk.59 software

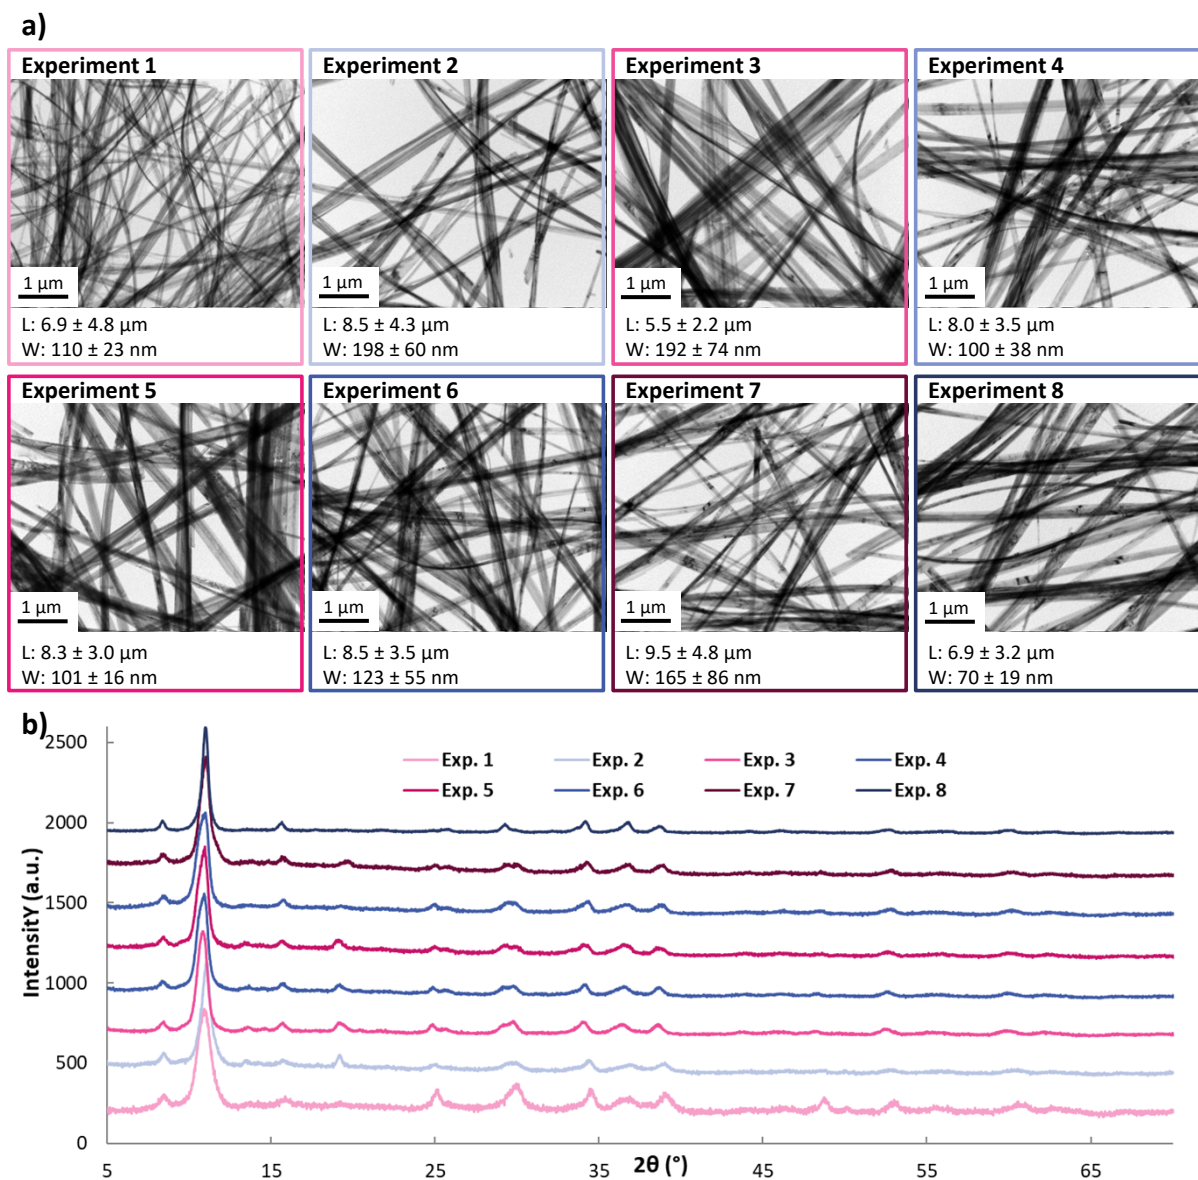

Figure SI\_2 : a) TEM pictures of eight independent syntheses of TiONRs with characteristics showing the morphological reproducibility of the TiONRs (L: length, W: width measured on different TEM images at different magnifications) ; b) X-Ray Diffraction patterns of the same eight syntheses showing the chemical reproducibility of TiONRs

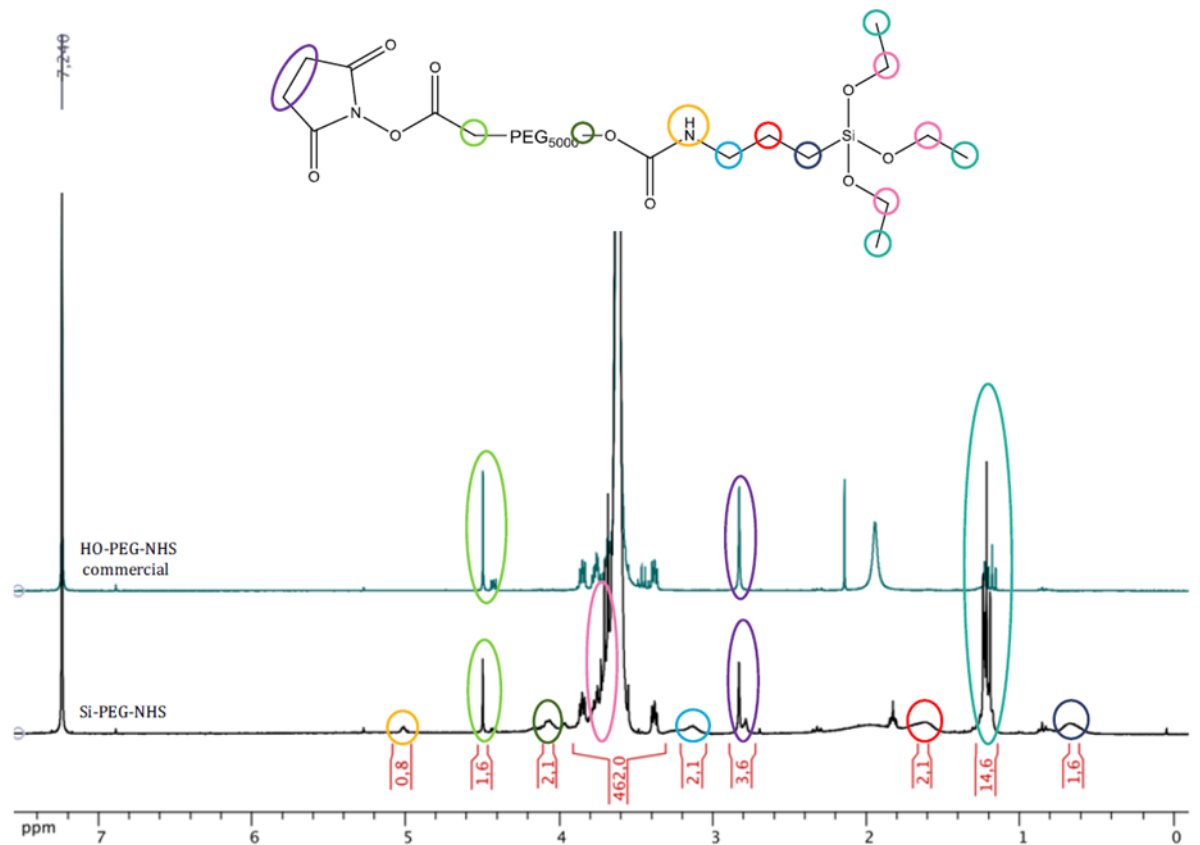

Figure SI\_3  $^1\text{H}$  NMR Spectra of the bi-functional NHS-PEG<sub>5000</sub>-Si (bottom) and starting NHS-PEG<sub>5000</sub>-OH (top) (300 MHz, CDCl<sub>3</sub>, 293K)

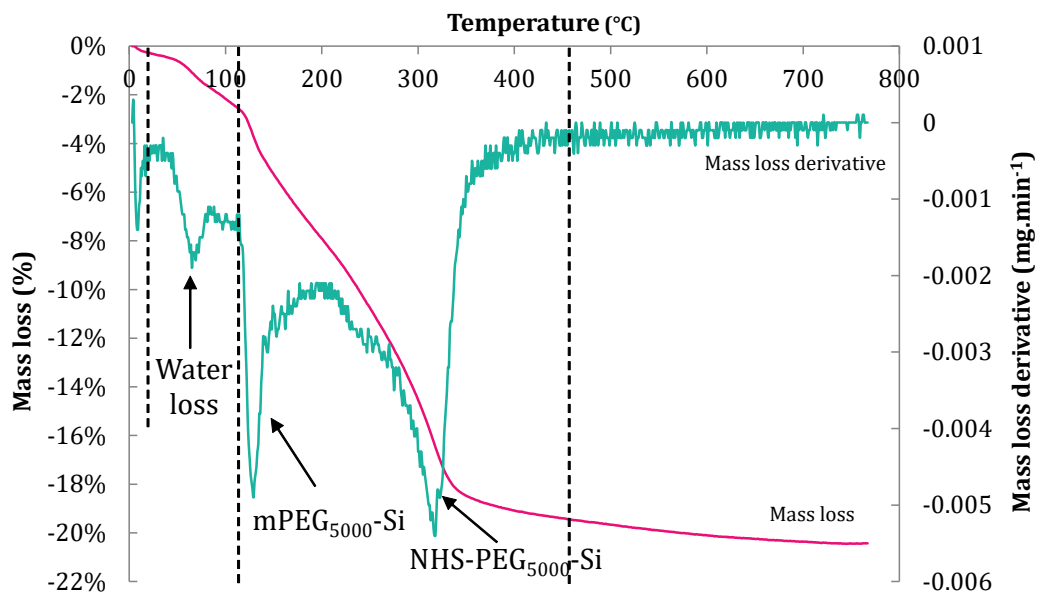

Figure SI\_4. Thermogravimetric Analyses of PEG-functionalized Titanate nanoribbons

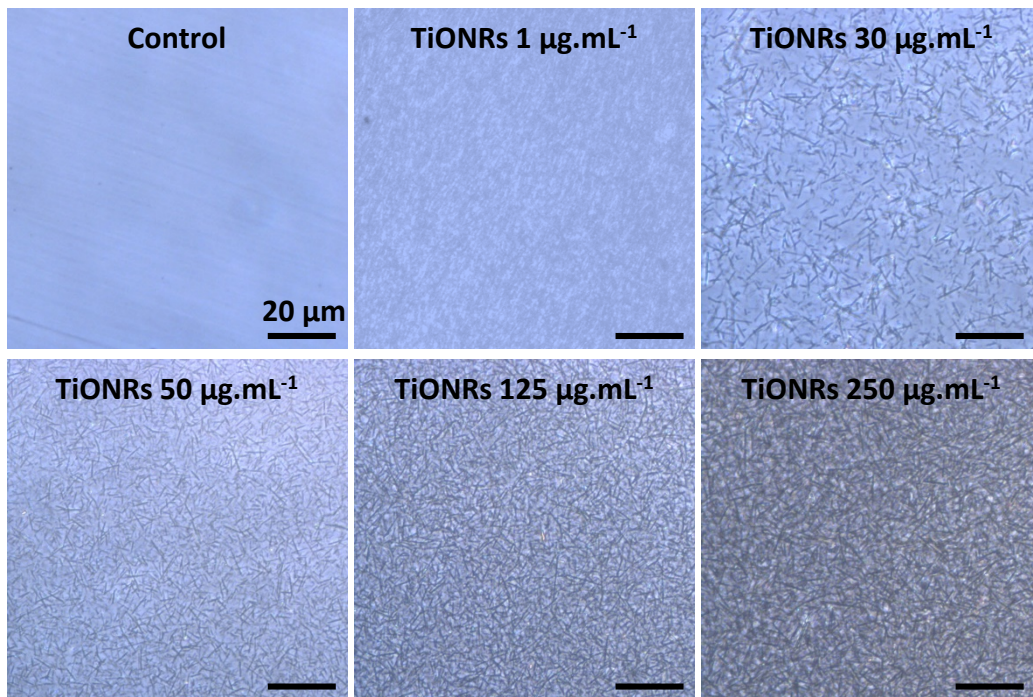

**Figure SI\_5. Optical microscopy images of cell culture plates covered with different concentrations of TiONRs. Below 50 µg.mL<sup>-1</sup> the plate is not fully covered and above this value, there are multilayers of TiONRs. Scale bars: 20 µm**
